# Supplementary material for: Catalytic tin radical mediated tricyclisations. Part 1. Monocyclisation studies †
Source: Royal Society of Chemistry journal article supplement (doi:10.1039/b000661k), 2000-01-01
Supplement: b000661k.doc [file b000661k.doc]

# Supplementary Data

Catalytic tin radical mediated tricyclisations. I. Monocyclisation studies.

**David R. Kelly* and Mark R. Picton**

*Department of Chemistry, Cardiff University, P. O. Box 912, Cardiff, Wales, UK CF10 3TB*

**Prop-2'-ynyl 4,6-di-*O*-acetyl-2,3-dideoxy-** **and** **-D-*erythro*-hex-2-eno­pyran­oside 7a, 8a**

Tri-*O*-acetyl-D-glucal **6a** (5.0 g, 18.4 mmol) was dissolved in toluene (50 ml) containing propargyl alcohol (1.15 g, 20.3 mmol, 1.1 equiv.) under nitrogen. Anhydrous zinc chloride (3.4 g, 24.9 mmol, 1.4 equiv.) was added in one portion to the mechanically stirred solution. A purple colour developed after 25 mins, the supernatant was decanted from the gelatinous solid, neutralised with solid sodium bicarbonate, filtered and concentrated to give the title compound **7a** (4.3 g, 87%) as a yellow syrup which solidified to a cream waxy solid. The 1H-NMR spectrum of this material in C6D6 showed the presence of a small amount of the -glycoside **8a**. The ratio was determined from comparison of the integration of the signals for 2-H of the -glycoside **7a**,  5.67 (d, *J* 10.7), overlapped with 2-H of the -glycoside **8a** with 3-H of the -glycoside **8a**,  5.59 (d, *J* 10.4Hz). Ratio :, 89:11. The only other distinctive signal of the -glycoside **8a** was  5.07 (1H, br s, 1-H). **Spectroscopic data for 7a** H 5.92 (1H, d, *J* 10.0, 3-H); 5.85 (1H, ddd, *J* 10.3, 2.7, 2.0, 2-H); 5.34 (1H, dq, *J* 9.7, 1.6, 4-H); 5.24 (1H, d, *J* 1.9, 1-H); 4.27 (2H, d, *J* 2.4, 7-H2); 4.25 (1H, dd, *J* 12.2, 5.2, 6a-H); 4.18 (1H, dd, *J* 12.2, 2.5, 6b-H); 4.09 (1H, ddd, *J* 9.6, 5.2, 2.5, 5-H); 2.48 (1H, t, *J* 2.4, 9-H); 2.11 (3H, s, CH3CO); 2.09 (3H, s, CH3CO); H (C6D6) 5.67 (1H, d, *J* 10.7, 3-H); 5.44 (1H, dt, *J* 10.3, 2.2, 2-H); 5.01 (1H, br s, 1-H); 4.17 (3H, m, 4-H, 6-H2); 4.02 (3H, m, 5-H, 7-H2); 1.93 (1H, t, *J* 2.4, 9-H); 1.58 (3H, CH3CO); 1.53 (3H, CH3CO); C 170.7, 170.2 (2CH, 2CO); 129.7, 127.3 (CH, CH, 3-C, 2-C); 92.8 (CH, 1-C); 79.1 (C, 8-C); 74.8 (CH, 9-C), 67.2, 65.2, (2CH, 4-C, 5-C); 62.8 (CH2, 6-C); 55.1 (CH2, 7-C); 20.9, 20.8 (2CH3CO); *m/z* (EI+) 268 (M, absent); 213 (12%, M - HC∫CCH2O); 166 (30%, M - 102, M - CH3CO2CH2CHO, retro Diels-Alder to diene); 124 (100%, M - CH3CO2CH2CHO - C2H2O); 111 (19%, M - CH3CO2CH2CHO - HC∫CCH2O, retro Diels-Alder, glycosidic cleavage); 85 (43%, M - CH3CO2CH2CHO - C2H2O - C3H3, retro Diels-Alder, ketene elimination, aglycon cleavage); *m/z* (CI+, NH3) 286 (66%, M + NH4, C13H20NO6 requires 286.1290; found 286.1291, < 1ppm error); 230 (76%, M + NH3 - HC∫CCH2O); 213 (100%, M - HC∫CCH2O); *v*max (nujol) 3280, 2120, 1740 (str. C=O); Rf 0.6 (hexane:EtAc, 50:50).

**Prop-2'-ynyl 2,3-dideoxy--D-*erythro*-hex-2-eno­pyrano­side 7b**

(Prop-2'-ynyl) 4,6-di-*O*-acetyl-2,3-dideoxy--D-*erythro*-hex-2-eno­pyrano­side **7a** (4.1 g, 15.30 mmol) was dissolved in dry methanol (400 ml). Sodium methoxide was added portion wise until the reaction solution recorded basic to universal indicator paper. The solution was stirred under nitrogen for 14 hours, after which TLC analysis indicated complete absence of starting material. The solution was neutralised with cardice, filtered and concentrated to a yellow syrup. The syrup was twice redissolved in dry toluene (60 ml), evaporated and concentrated to a brown oil **7b** (2.4 g, 86%) with a pungent odour. Combustion analysis; C9H12O4 requires C 58.70, H 6.52; found C 58.59, H 6.59; H 5.94 (1H, d, *J* 10.2, 3-H); 5.70 (1H, dt, *J* 10.2, 2.4, 2-H); 5.13 (1H, s, 1-H); 4.25 (2H, m, 7-H2); 4.19 (1H, dd, *J* 9.2, 1.5, 4-H); 3.81 (2H, m, 6-H2); 3.66 (1H, ddd, *J* 8.9, 4.4, 4.5, 5-H); 2.39 (1H, t, *J* 2.3, 9-H); 1.8 (2H, br, 2OH); H (DMSO-*d*6) 5.94 (1H, d, *J* 10.2, 3-H); 5.65 (1H, dt, *J* 10.2, 2.4, 2-H); 5.13 (1H, t, *J* 1.1, 1-H); 5.01 (1H, d, *J* 6.7, 4-OH); 4.49 (1H, t, *J* 5.59, 6-OH); 4.28 (2H, m, 7-H2); 4.02 (1H, br. t, 4-H); 3.76 (1H, m, 6-H); 3.65 (1H, dt, *J* 11.6, 5.7, 5-H); 3.55 (1H, m, 6-H); 2.83 (1H, t, *J* 2.4, 9-H); C (DMSO) 135.3 (CH, 3-C); 124.9 (CH, 2-C); 91.9 (CH, 1-C); 80.3 (C, 8-C, split by 2*J*C-H coupling); 77.2, 73.2, 62.5 (3CH, 4-C, 5-C, 9-C); 61.0 (CH2, C-7); 54.1 (CH2, 6-C); *m/z* (CI, CH4) 184 (M, absent); 167 (7%, MH - H20); 129 (100%, M - OCH2C∫CH); 124 (42%, diene of retro Diels-Alder); 69 (74%, diene of retro Diels-Alder - OCH2C∫CH);*v*max (nujol) 3300, 2110, 1575, 1390, 1170; Rf 0.4 (hexane:EtOAc, 50:50).

**Prop-2'-ynyl 2,3-dideoxy-6-*O*-pivaloyl--D-*erythro*-hex-2-eno­pyran­oside 7c**[[1]](#endnote-2),[[2]](#endnote-3)**, prop-2'-ynyl 2,3-dideoxy-6-*O*-pivaloyl--D-*erythro*-hex-2-eno­pyran­oside 8c, prop-2'-ynyl 2,3-dideoxy-4,6-di-*O*-pivaloyl--D-*erythro*-hex-2-eno­pyran­oside 7d, and (2*R*)-2-hydroxy-2-furylethyl pivaloate 10e.**

(Prop-2'-ynyl) 2,3-dideoxy--D-*erythro*-hex-2-enopyranoside **7b** (5.0 g, 27 mmol), DMAP (0.15 g, 1.15 mmol, 0.04 equiv.) and triethylamine (3.0 g, 29.5 mmol, 1.1 equiv.) were dissolved in dry dichloromethane (500 ml) and cooled in an acetone/cardice bath to -30°C. Pivaloyl chloride (4.5 g, 30.0 mmol, 1.1 equiv.) was dissolved in dry dichlomethane (250 ml) and added dropwise to the solution under nitrogen. During addition copious white fumes were evolved. The reaction was stirred under nitrogen for 16 hours. TLC analysis indicated absence of starting material with numerous products present. The solution was evaporated to one fifth the original volume, filtered to remove triethylamine hydrochloride, and concentrated to dryness. Column chromatography, eluting with hexane to 20% ethyl acetate afforded (in order of elution) **7d** (1.8 g, 25%), **7c** (0.45 g, 6%), **10e** (1.6 g, 22%), **8c** (0.15 g, 2%), **7b** (0.15 g, 2%) and an unseparable mixture of **7c** and **10e** (0.61 g, 12%). **Spectroscopic data for (2*R*)-2-hydroxy-2-furylethyl pivaloate 10e** Combustion analysis; C11H16O4 requires C 62.25, H 7.60; found C 62.43, H 7.80; H 7.30 (1H, t, *J* 0.9, 1-H); 6.36 (1H, dd, *J* 3.2, 1.9, 2-H); 6.34 (1H, dd, *J* 3.3, 0.4, 3-H); 4.86 (1H, dd, *J* 5.9, 5.6, 5-H); 4.38 (2H, m, 6-H2); 2.93 (1H , br OH); 1.20 (9H, s, 8-H3, 9-H3, 10-H3); H (C6D6) 7.11 (1H, br s, 1-H); 6.18 (1H, d, *J* 3.0, 2-H); 6.12 (1H, dd, *J* 3.1, 1.8, 3-H); 4.79 (1H, apparent q, *J* 5.4, 5-H); 4.41 (1H, dd, *J* 11.4, 6.5, 6a-H); 4.36 (1H, dd, J 11.3, 4.8, 6b-H); 2.06 (1H, br.s., OH); 1.21 (9H, s, 9-H3, 10-H3, 11-H3); 1H-1H *J*-COSY NMR 1-H to 2-H; 5-H to 6a-H to 6b-H; 5-H to 6b-H; C 178.0 (s, C=O, 7-C); 153.1 (s, C, 4-C); 142.3 (d, CH, 1-C); 109.9 (d, CH, 3-C); 107.0 (d, CH, 2-C); 65.8, 65.5 (t, d, CH2, CH, 6-C to 5-C, overlap in off resonance spectrum); 38.6 (s, C, 8-C); 27.3 (q, 3CH3, 9-C, 10-C, 11-C); 13H-1H *J*-COSY NMR H to C 7.30 to 142.3; 6.36 to 109.9; 6.34 to 107.0; 4.86 to 65.8; 4.38 to 65.5; 2.93 no correlation; 1.20 to 27.3; *m/z* (EI+) 212 (C11H16O4, M, absent); 195 (88%, M - OH); 110 (100%); 96 (97%, C5H4O4, benzylic type cleavage); 84 (88%); 69 (54%); 57 (63%); 56 (68%); *v*max (CDCl3) 3500 (br., OH); 2980; 1724 (str., C=O); 1481; 1285; 1160; Rf 0.65 (hexane:EtOAc, 50:50).

**(Prop-2'-ynyl) 2,3-dideoxy-6-*O*-pivaloyl--D-*erythro*-hex-2-eno­pyran­oside 7c, prop-2'-ynyl 2,3-dideoxy-6-*O*-pivaloyl--D-*erythro*-hex-2-eno­pyran­oside 8c, and prop-2'-ynyl 2,3-dideoxy-4,6-di-*O*-pivaloyl--D-*erythro*-hex-2-enopyranoside 7d**

A stirred solution of 1-(prop-2'-ynyl)-2,3-dideoxy--D-*erythro*-hex-2-enopyranoside **7b** (1.0 g, 5.4 mmol) in dry pyridine (20 ml) was treated with a pivaloyl chloride solution (1.0 g, 8.3 mmol, 1.5 equiv.) in dry pyridine (20 ml) dropwise and under nitrogen at ambient temperature. Copious white fumes were evolved during addition. The solution was stirred for 16 hours. Ice (approx 100g) was added and the residual pyridine removed by high vacuum distillation. The residue was dissolved in dichloromethane (50 ml), washed with saturated NH4Cl solution (2 x 50 ml), water (3 x 50 ml), dried over MgSO4 and purified by column chromatography to yield the monopivaloate **7c** (630 mg, 41%), the dipivaloate **7d** (380 mg, 24%) and a trace of the -propynyl monopivaloate **8c** (5 mg, 0.3%)**.** **Spectroscopic data for prop-2'-ynyl 2,3-dideoxy-6-*O*-pivaloyl--D-*erythro*-hex-2-eno­pyran­oside 7c** H 6.01 (1H, dd, *J* 10.1, 1.1, 3-H); 5.76 (1H, ddd, *J* 10.1, 2.5, 2.5, 2-H); 5.18 (1H, d, *J* 1.1, 1-H); 4.44 (1H, dd, *J* 12.1, 5.3, 7a-H); 4.30 (3H, m, 6-H2, 7b-H); 4.00 (1H, br. m, 4-H); 3.82 (1H, ddd, *J* 9.4, 5.4, 2.3, 5-H); 2.55 (1H, br s, 4-OH); 2.45 (1H, t, *J* 2.4, 9-H); 1.24 (9H, s, 12-H3, 13-H3, 14-H3, C(C**H3**)3); H (C6D6) 5.97 (1H, d, *J* 10.1, 3-H); 5.73 (1H, dt, *J* 10.2, 2.3, 2-H); 5.33 (1H, br s, 1-H); 4.65 (1H, dd, *J* 12.1, 5.1, 6a-H); 4.56 (1H, dd, *J* 12.1, 2.1, 6b-H); 4.36 (2H, d, *J* 2.2, 7-H2); 4.10 (1H, br d, *J* 9.4, 4-H); 4.03 (1H, ddd, *J* 9.4, 5.1, 2.2, 5-H); 2.23 (1H, t, *J* 2.4, 9-H); 1.37 (9H, s, 12-H3, 13-H3, 14-H3, C(C**H3**)3); 1H-1H *J*-COSY NMR (C6D6) 1-H to 2-H to 3-H to 4-H (weak) to 5-H to 6a-H to 6b-H; 7a-H to 7b-H to 9-H; 7a-H to 9-H; C 179.3 (C, 10-C, C=O); 133.7 (CH, 3-C); 125.9 (CH, 2-C); 92.7 (CH, 1-C); 79.3 (C, 2*J*C-H fine coupling, 8-C); 74.7 (CH, 9-C); 70.8 (CH, 4-C); 64.3 (C, 5-C); 63.3 (CH2, 6-C); 54.8 (CH2, 7-C); 39.0 (C, 11-C); 27.3 (CH3, 12-C, 13-C, 14-C, C(**C**H3)**3**); *m/z* (EI+) 268 (M, absent); 213 (51%, M-55, M - HC∫CCH2O); 195 (26%, M-73, M - HC∫CCH2O+-H2O); 124 (77%, M-144, M - PvOCH2CHO, retro Diels-Alder); 85 (91%, M-183, C5H9O+ or M- retro Diels-Alder - C3H3) 57 (100%, M-111, C3H5O+); *m/z* (CI+, NH3) 286 (9%, M+NH4, C14H24O5N requires 286.1654; found 286.1654); 230 (12%); 213 (40%); 195 (80%); 162 (26%); 145 (52%); 58 (100%); *v*max (neat) 3450 ; 2100 (weak, C∫C); 1730 (str., C=O); 1600; 1480; Rf0.5 (hexane:EtOAc, 50:50).

**Spectroscopic data for prop-2'-ynyl 2,3-dideoxy-4,6-di-*O*-pivaloyl--D-*erythro*-hex-2-enopyranoside 7d** Combustion analysis C19H28O6 requires C 64.75, H 8.01; found C 64.48, H 7.90; H 6.01 (1H, d, *J* 10.1, 3-H); 5.76 (1H, ddd, *J* 10.2, 2.4, 2,4, 2-H); 5.29 (1H, d, *J* 8.3, 4-H); 5.18 (1H, s, 1-H); 4.30 (2H, m, 6-H2); 4.12 (3H, m, 5-H, 7-H2); 2.44 (1H, dd, *J* 2.4, 2.4, 9-H); 1.24 (9H, s, 12-H3, 13-H3, 14-H3 or 17-H3, 18-H3, 19-H3, C(C**H3**)3); 1.19 (9H, s, 12-H3, 13-H3, 14-H3 or 17-H3, 18-H3, 19-H3, C(C**H3**)3); C 180.4 (CO, C-10 or C-15); 180.0 (CO, C-15 or C-10); 132.4 (CH, 2-C); 129.3 (CH, 3-C); 95.3 (CH, 1-C); 81.3 (C, 8-C); 77.2 (CH, 9-C); 70.0 (CH, 4-C); 67.1 (CH, 5-C); 65.1 (CH2, 6-C); 57.2 (CH2, 7-C); 41.1 (2C, 11-C, 16-C); 29.5 (3CH3, 12-C, 13-C, 14-C or C-17, C-18, C-19, C(**C**H3)**3**); 29.3 (3CH3, C-17, C-18, C-19 or 12-C, 13-C, 14-C, C(**C**H3)**3**); *m/z* (EI+) 352 (M, C19H28O6; absent); 297 (26%, M - HC∫CCH2O); 208 (53%, M - PvOCH2CHO, retro Diels-Alder); 124 (54%, M - retro Diels-Alder - C5H9O); 85 (68%, Pv+) 57 (100%, C3H5O+); *v*max (nujol) 3280; 2960; 2100 (weak); 1720(str); *v*max (neat) 3250 (str.); 2100 (weak, C∫C); 1800 (weak); 1715 (C=O); Rf0.5 (hexane:EtOAc, 50:50).

**Spectroscopic data for (prop-2'-ynyl) 2,3-dideoxy-6-*O*-pivaloyl--D-*erythro*-hex-2-eno­pyran­oside 8c** Combustion analysis C14H20O5 requires C 62.27 H 7.51 found C 62.80 H 7.50; H 6.07 (1H, ddd, *J* 10.2, 3.0, 1.6, 3-H); 5.83 (1H, ddd, *J* 10.2, 1.6, 1.6, 2-H); 5.34 (1H, dd, *J* 3.2, 1.6, 1-H); 4.42 (1H, dd, *J* 11.9, 5.4, 6a-H); 4.35 (2H, m, 7-H2); 4.25 (1H, dd, *J* 11.8, 4.5, 6b-H); 4.14 (1H, br, 4-H); 3.82 (1H, m, 5-H); 2.44 (1H, dd, *J* 2.3, 2.3, 9-H); 2.25 (1H, br s, 4-OH);1.28 (9H, s, 12-H3, 13-H3, 14-H3, C(C**H3**)3); H (C6D6) 5.61 (1H, dm, *J* 10, unresolved, 3-H); 5.51 (1H, d, *J* 10.4, 2-H); 5.16 (1H, d, *J* approx 1.6, 1-H); 4.32 (1H, dd, *J* 11.9, 6.0, 6a-H); 4.24 (1H, dd, *J* 15.7, 2.4, 7a-H); 4.12 (2H, d *J* 15.7, 2.4, 7b-H overlaps d, not measurable 6b-H); 3.74 (1H, br m, 4-H); 3.54 (1H, ddd, *J* 6.6, 5.7, 4.0, 5-H); 1.95 (1H, t, *J* 2.4, 9-H); 1.40 (1H, br s, 4-OH); 1.14 (9H, s, 12-H3, 13-H3, 14-H3, C(C**H3**)3); 1H-1H *J*-COSY NMR (C6D6) 2-H to 3-H; 4-H to 5-H to 6a-H (weak) to 6b-H; 7a-H to 7b-H; C 178.8 (C, 10-C, C=O); 130.6 (CH, 2-C); 127.4 (CH, 3-C); 93.5 (CH, 1-C); 79.7 (C, 8-C); 75.2 (CH? absent in 90° and 135° DEPT spectra, 9-C); 69.9 (CH, 4-C); 65.1 (CH, 5-C); 62.1 (CH2, 6-C); 55.8 (CH2, 7-C); 39.3 (C, 11-C); 27.3 (CH3, 12-C, 13-C, 14-C, C(**C**H3)**3**); *m/z* (EI+) 268 (absent, M, C14H20O5); 213 (2%, M - HC∫CCH2O); 124 (42%, M - PvOCH2CHO, retro Diels-Alder); 85 (94%, C5H9O+ or M - retro Diels-Alder - C3H3); 69 (25%); 57 (100%, C3H5O+); *v*max (CDCl3) 3462 (br. OH); 3290 (C∫**C-H**); 2975; 2911; 2875; 1725 (str. C=O); 1483; 1289; 1167; Rf 0.2 (hexane:EtOAc, 50:50); 0.4 (Et2O).

**(Prop-2'-ynyl) 2,3-dideoxy-6-*O*-*tert*-butyldimethylsilyl--D-*erythro*-hex-2-enopyranoside 7f,**[[3]](#endnote-4),[[4]](#endnote-5) **(prop-2'-ynyl) 2,3-dideoxy-4-*O*-*tert*-butyldimethylsilyl--D-*erythro*-hex-2-enopyranoside 7g and (prop-2'-ynyl) 2,3-dideoxy-4,6-di-*O*-*tert*-butyldimethylsilyl--D-*erythro*-hex-2-enopyranoside 7h and (2*R*)-[1,2-di(*tert*-butyl­dimethyl­silyloxy)­ethyl]-furan 10h.**

(Prop-2'-ynyl) 2,3-dideoxy--D-*erythro*-hex-2-enopyranoside **7b** (1.05 g, 5.71 mmol), DMAP (0.03 g, 0.23 mmol, 0.04 equiv.) and triethylamine (0.6 g, 5.9 mmol, 1.1 equiv.) were dissolved in dry dichloromethane (100 ml) and cooled in an ice bath to 0°C. *tert*-Butyl­dimethyl­silyl chloride (0.90 g, 6.0 mmol, 1.1 equiv.) was dissolved in dry dichloromethane (50 ml) and added dropwise under nitrogen to the reaction at a rate to maintain a temperature of less than 5°C. Copious white fumes were evolved during the addition. On completion of the addition the reaction solution was allowed to attain ambient temperature and stirred under nitrogen for 14 hours. TLC analysis indicated completion of reaction. The solution was concentrated to one fifth the original volume, filtered to remove triethylamine hydrochloride and concentrated to a yellow syrup with a musky odour. TLC analysis indicated a complex mixture of products. Crude products were purified by flash silica gel chromatography; eluent hexane to 20% ethyl acetate to yield the 4,6-di-*O*-silyl ether **7h** (130 mg, 8%), the furan **10h** (< 5 mg), the 6-*O*-silyl ether **7f** (420 mg, 26%), the 4-*O*-silyl ether **7g** (60 mg, 4%), starting material **7b** (0.70 mg, 4%) and an unseparable mixture of **7f** and **10h**

**Spectroscopic data for (prop-2'-ynyl)-2,3-dideoxy-6-*O*-*tert*-butyl­dimethyl­silyl--D-*erythro*-hex-2-enopyranoside 7f** H 5.96 (1H, dt, *J* 10.2, 1.2, 3-H); 5.73 (1H, dt, *J* 10.2, 2.4, 2-H); 5.14 (1H, s, 1-H); 4.27 (2H, m, 7-H2); 4.19 (1H, dhex, *J* 5.8, 1.7, 4-H); 3.91 (1H, dd, *J* 9.9, 5.0, 6a-H); 3.74 (2H, m, 5-H, 6b-H); 2.86 (1H, d *J* 3.7, OH); 2.41 (1H, t, *J* 2.3, 9-H); 0.95 (9H, s, 13-H3, 14-H3, 15-H3, (C**H3**)3CSi); 0.15 (6H, s, 10-H3, 11-H3, (C**H3**)2Si); 1H-1H *J*-COSY NMR 1-H to 2-H to 3-H; 4-H to OH; 4-H to 5-H to 6a-H to 6-Hb to 5-H; 7-H2 to 9-H; C 133.4 (CH, 3-C); 125.3 (CH, 2-C); 92.6 (CH, 1-C); 79.5 (C, 8-C); 74.4 (CH, 9-C, absent from 90° and 135° DEPT, confirmed by coupling in 13C-off resonance spectrum); 70.3 (CH, 4-C); 67.1 (CH, 5-C); 65.7 (CH2, 6-C); 54.8 (CH2, 7-C, confirmed by 1H-13C-COSY experiment); 25.9 (3CH3, 13-C, 14-C, 15-C, (**C**H3)**3**CSi); 18.3 (C, 12-C); *m/z* (EI+) 298 (0%, M+, C15H26O4Si); 243 (10%, M - HC∫CCH2O); 225 (7%, M - HC∫CCH2O - H2O); 185 (8%); 167 (10%, M- OSitBuMe2); 117 (60%, Me2SiOCH2CHO; aldehyde from retro Diels-Alder - tBu); 75 (100%, HOSiMe2); *m/z* (CI+, NH3) 316 (10%, M+NH4, C15H30O4NSi requires 314.1944, found 316.1944); 260 (54%); 243 (56%); 225 (50%); 192 (100%); 174 (32%); *v*max (neat) 3450 (br.); 3300; 3040; 2950-2850; 2100 (weak);Rf0.65 (hexane:EtOAc).

**Spectroscopic data for (prop-2'-ynyl)-2,3-dideoxy-4-*O*-*tert*-butyl­di­methyl­silyl--D-*erythro*-hex-2-enopyranoside 7g** H 5.91 (1H, br. d, *J* 9.1, 3-H); 5.63 (1H, ddd, *J* 10.1, 2.2, 2.2, 2-H); 5.20 (1H, br. s, 1-H); 4.30 (2H, m, 7-H2); 4.26 (1H, br. d, *J* 7.2, 4-H); 3.84 (1H, br. m, 6a-H); 3.72 (2H, m, 5-H, 6b-H); 2.45 (1H, t, *J* 2.3, 9-H); 1.85 (1H, br. t, OH); 0.89 (9H, s, 13-H3, 14-H3, 15-H3, (C**H3**)3CSi); 0.08, 0.07 (6H, s, s, 10-H3, 11-H3, (C**H3**)2Si); 1H-1H *J*-COSY NMR 2-H to 3-H; 4-H to 5-H to 6a-H to 6-Hb to 5-H.

**Spectroscopic data for (2*R*)-[1,2-di(*tert*-butyl­dimethyl­silyloxy)­ethyl]-furan 10h** H 7.32 (1H, t, *J* 0.8); 6.37 (1H, dd, *J* 2.9, 2.1); 6.33 (1H, dd, *J* 2.7, 0.4); 4.78 (1H, dd, *J* 6.8, 4.4); 3.87 (3H, m); 0.96 (18H, s, (C**H3**)3CSi); 0.1 (12H, s, (C**H3**)2Si). The 1H-NMR data for the bis(*t*-butyldiphenylsilyl) analogue **10k** is comparable to that reported here.[[5]](#endnote-6)

**Spectroscopic data for (prop-2'-ynyl)-2,3-dideoxy-4,6-di-*O*-*tert*-butyl­dimethylsilyl--D-*erythro*-hex-2-enopyranoside 7h** Repeated chromatography afforded a small amount of pure product. H 5.79 (1H, d, *J* 10.2, 3-H); 5.62 (1H, dt, *J* 10.1, 2.3, 2-H); 5.07 (1H, br. s, 1-H); 4.23 (2H, m, 7-H2); 4.08 (1H, m, 4-H); 3.79 (1H, dd, *J* 11.0, 1.5, 6a-H); 3.64 (1H, dd, *J* 11.0, 5.9, 6b-H); 3.61 (1H, m, 5-H); 2.34 (1H, t, *J* 2.3, 9-H); 0.83, 0.81 (18H, s, s, 13-H3, 14-H3, 15-H3, 19-H3, 20-H3, 21-H3, (C**H3**)3CSi); 0.08 (12H, s, 10-H3, 11-H3, 16-H3, 17-H3, (C**H3**)2Si); C 133.0 (CH, 2-C); 124.0 (CH, 3-C); 91.3 (CH, 1-C); 78.5 (C, 8-C); 73.3 (CH, absent from 90° and 135° DEPT spectra, 9-C); 71.8 (CH, 4-C); 63.0 (CH, 5-C); 61.5 (CH2, 6-C); 54.4 (CH2, 7-C); 24.9, 24.6 (CH3, CH3, 13-C, 14-C, 15-C, 19-C, 20-C, 21-C, (**C**H3)3CSi); 17.4, 16.1 (C, C, 12-C, 18-C); *v*max (CDCl3); 3309 (weak, C∫**C-H**); 2957; 2860; 1470; 1386; 1259; 1096; Rf0.80 (hexane:EtOAc).

**(Prop-2'-ynyl) 2,3-dideoxy-6-*O*-*tert*-butyldimethylsilyl--D-*erythro*-hex-2-enopyranoside 7f**

(Prop-2'-ynyl) 2,3-dideoxy--D-*erythro*-hex-2-enopyranoside **7b** (1.0 g, 5.4 mmol), was dissolved in dry DMF (2 ml) under nitrogen at ambient temperature. *tert*-Butyldimethylsilyl chloride (0.90 g, 5.96 mmol, 1.2 equiv.), and imidazole (0.92 g, 13.5 mmol, 2.5 equiv.) were both added portionwise and the solution allowed to stir for 6 hours. TLC analysis indicated small amounts of starting material. Dichloromethane (10 ml) was added and a white precipitate immediately formed. Solution was filtered through glass wool and secondly through cellulose, washed with HCl (1N, 10 ml) and the layers separated. The upper aqueous layer was washed with dichloromethane (10 ml), separated and the two organic layers combined, and dried over sodium sulphate for 12 hours. The suspension was filtered, and concentrated to a viscous yellow oil. Column chromatography; eluent hexane to 20% ethyl acetate afforded the title compound **7f** (1.22 g, 75%) as a clear oil. Methanolic washing of the column yielded starting material **7b** (0.11 g, 6.8%) as a yellow oil.

**(Prop-2'-ynyl) 2,3-dideoxy-4-*O*-propiolyl-6-*O*-*tert*-butyl­dimethyl­silyl--D-*erythro*-hex-2-enopyranoside 9**

A stirred solution of (prop-2'-ynyl) 2,3-dideoxy-6-O-*tert-*butyldimethylsilyl--D-*erythro-*hex-2-eno­pyrano­side **7f** (1.0 g, 3.35 mmol), propiolic acid (2.35 g, 31.8 mmol, 9.5 equiv.) in dry diethyl ether (10 ml) under nitrogen was cooled to -20°C. A solution of DMAP (41 mg, 0.34 mmol, 0.1 equiv.) and DCC (0.76 g, 3.7 mmol, 1.1 equiv.) in dry ether (10 ml) was added dropwise under nitrogen to maintain the temperature in the range -15°C to -20°C. On the addition of the first drops a white precipitate was observed. On completion of addition, the solution was allowed to attain ambient temperature and stirred for 14 hours. TLC analysis indicated the solution contained several products. The solution was filtered through cellulose (to remove DCU), washed with cooled HCl (1N, 2x20 ml), saturated sodium chloride solution (2x20 ml), dried over magnesium sulphate for one hour, filtered and evaporated to give a yellow oil, which solidified to a thick brown oil on standing. Flash silica gel column chromatography, eluted with hexane to 20% ethyl acetate afforded the title compound **9** (119 mg, 10.2%) and starting material **7f** (113 mg, 9.6%). H 5.94 (1H, d *J* 10.8, 3-H); 5.86 (1H, dt, *J* 10.1, 2.2, 2-H); 5.44 (1H, dd, *J* 9.4, 1.4, 4-H); 5.24 (1H, br. s, 1-H); 4.31 (2H, app. d, *J* 2.5, 7-H2); 3.98 (1H, ddd, *J* 9.4, 4.5, 3.1, 5-H); 3.77 (2H, m, 6-H2); 2.93 (1H, s, 12-H); 2.44 (1H, dd, *J* 2.4, 2.4, 9-H); 0.91 (9H, s, 16-H3, 17-H3, 18-H3, (C**H3**)3CSi);0.07 (6H, s, 13-H3, 14-H3, (C**H3**)2Si); 1H-1H *J*-COSY NMR 1-H to 2-H to 3-H; 4-H to 5-H to 6-Ha to 6b-H; 7a-H to 7b-H to 9-H; 7a-H to 9-H; C (C=0, 10-C, absent); 128.8 (CH, 2-C); 128.1 (CH, 3-C); 92.5 (CH, 1-C); 79.6 (C, 8-C); 76.4 (C, 11-C) 75.6 (CH, 9-C or 12-C); 74.6 (CH, 12-C or 9-C); 69.3 (CH, 4-C); 67.2 (CH, 5-C); 62.4 (CH2, 6-C); 54.9 (CH2, 7-C); 25.9 (3CH3, 16-C, 17-C, 18-C); 18.1 (C, 15-C); ; *m/z* (EI+) 350 (C18H26O5Si, absent); 295 (67%, M - HC∫C-CH2O); 281 (55%, M - HC∫C-CO2); 237 (51%); 225 (53%); 176 (9%, M - HC∫C-CO2-CH=CH-CH=CH-O-CH2-C∫CH, diene from retro Diels-Alder); 149 (35%); 127 (56%); 117 (100%, Me2SiOCH2CHO; aldehyde from retro Diels-Alder - tBu); 81 (96%); 53 (57%); *v*max (neat) 3500 (br.); 3300 (str.); 2950, 2850, 2150 (weak); 1720 (str.); 1460; Rf0.8 (hexane:EtOAc 50:50).

**Ethyl 4,6-di-*O*-acetyl-2,3-dideoxy--D-*erythro*-hex-2-enopyranoside. 13a**[[6]](#endnote-7)

Tri-*O*-acetyl-D-glucal **6a** (4.0 g, 14.9 mmol) was dissolved in benzene (20 ml) containing ethanol (1.8 ml, 33.8 mmol, 2.3 equiv.) under nitrogen. Anhydrous zinc chloride (3.2 g, 23.5 mmol, 1.3 equiv.) was added in one portion to the mechanically stirred solution. A purple colour developed after 15 mins, the supernatant was decanted from the gelatinous solid, neutralised with solid sodium bicarbonate, filtered and concentrated to give the title compound **13a** as a waxy white solid (2.7 g, 67%); Combustion analysis; C12H18O6 requires C 55.8, H 7.02; found C 55.96, H 6.80; H 5.88 (2H, m, 2-H, 3-H); 5.30 (1H, dd, *J* 9.6, 1.1, 4-H); 5.05 (1H, s, 1-H); 4.25 (1H, dd, *J* 12.0, 5.4, 6a-H); 4.19 (1H, dd, *J* 12.1, 2.5, 6b-H); 4.12 (1H, ddd, *J* 9.6, 5.4, 2.5, 5-H); 3.83 (1H, dq, *J* 9.7, 7.1, 7a-H); 3.58 (1H, dq, *J* 9.6, 7.0, 7b-H); 2.10 (3H, s, CH3CO); 2.04 (3H, s, CH3CO); 1.11 (3H, t, *J* 7.0, 8-H3); 1H-1H *J*-COSY NMR 1-H to 2-H to 3-H to 4-H to 5-H to 6a-H to 6b-H to 5-H; 7a-H to 7b-H to 8-H3 to 7a-H; C 170.8, 170.3 (2C, 2CO); 129.1, 128.0 (2CH, 2-C, 3-C); 94.3, (CH, 1-C); 66.9, 65.4 (2CH, 4-C, 5-C); 64.4, 63.1 (2CH2, 6-C, 7-C); 21.0, 20.8 (2**C**H3CO); 15.4 (CH3, 8-C); *m/z* (EI+) 258 (absent, M, C12H18O6); 213 (10%, M - OEt); 156 (22%, M - AcOCH2CHO, diene from retro Diels-Alder); 153 (48%, M - AcOH - OEt); 114 (100%, M - AcOCH2CHO - C2H2O); 111 (26%, M - AcOCH2CHO - OEt); 86 (13%); 57 (23%); *m/z* (CI+, NH3) 276 (22%, M + NH4+, C12H22NO6 requires 276.1447, found 276.1147); 230 (20%, M + NH4+ - EtOH); 213 (78%, M - OEt); 172 (100%); 77 (50%); *v*max (nujol) 1740, 1220, 1100; Rf 0.65 (hexane:EtOAc, 50:50).

**Ethyl 2,3-dideoxy--D-*erythro*-hex-2-enopyranoside 13b**[[7]](#endnote-8)

Ethyl 4,6-di-*O*-acetyl-2,3-dideoxy--D-*erythro*-hex-2-eno­pyrano­side **13a** (2.0 g, 7.4 mmol) was dissolved in dry methanol (30 ml). Sodium methoxide was added portionwise until the reaction solution was basic to universal indicator paper. The solution was stirred under nitrogen for 14 hours, after which TLC analysis indicated the absence of starting material. The solution was neutralised with cardice, filtered and concentrated to a yellow syrup. The syrup was twice redissolved in dry toluene (30 ml) which was removed on a rotary evaporator. The product was finally concentrated to give the title compound **13b** as a yellow oil (1.23 g, 91%); Combustion analysis C8H14O4 requires C 55.20 H 8.04, found C 55.15 H 8.23 H 5.95 (1H, d, *J* 10.1, 3-H); 5.71 (1H, ddd, *J* 10.2, 2.0, 2.0, 2-H); 4.98 (1H, d, *J* 0.6, 1-H); 4.18 (1H, very br s, 4-H); 3.82 (3H, m, 6-H2, 7a-H); 3.66 (1H, m, 5-H); 3.55 (1H, dq, *J* 9.5, 7.2, 7b-H); 2.1 (2H, very br s, OH2) 1.23 (3H, t, *J* 7.1, 8-H3); C 133.6 (CH, 3-C); 126.9 (CH, 2-C); 94.5, (CH, 1-C); 71.8 (CH, 4-C); 64.8 (CH, 5-C); 64.6, 63.3 (2CH2, 6-C, 7-C); 15.7 (CH3, 8-C); *m/z* (EI+) *m/z* 174 (absent, M, C8H14O4); 129 (15%, M - OEt); 114 (56%, M - HOCH2CHO, diene from retro Diels-Alder); 88 (36%, diene from retro Diels-Alder - C2H5); 69% (23%, M - OEt - HOCH2CHO); 57 (100%, C3H5O); *v*max(nujol) 3320(str); 3020, 1590(str); 1375(str); 1170, 1080(str); Rf 0.9 (EtOAc:MeOH, 85:15).

**Ethyl 6*-O-tert*-butyldimethylsilyl*-*2,3-dideoxy--D-*erythro*-hex-2-eno­pyranoside 13c and ethyl 4,6-di-(*O-tert*-butyldimethylsilyl)*-*2,3-dideoxy--D-*erythro*-hex-2-eno­pyran­oside 13d**.

Ethyl-2,3-dideoxy--D-*erythro-*hex-2-eno­pyranoside **13b** (500 mg, 2.87 mmol), DMAP (0.04 g, 0.31 mmol, 0.1 equiv.) and triethylamine (450 mg, 4.4 mmol, 1.5 equiv.) were dissolved in dry dichloromethane (25 ml) and cooled in an ice bath to 0°C. *tert*-Butyldimethylsilyl chloride (450 mg, 3.0 mmol, 1.1 equiv.) was dissolved in dry dichloromethane (50 ml) and added dropwise under nitrogen at a rate to maintain a temperature of less than -5°C. The dark brown solution was allowed to attain ambient temperature and stirred for 16 hours under nitrogen. TLC analysis of the dark yellow solution indicated completion of reaction. The solution was concentrated to one fifth the original volume, filtered to remove triethylamine hydrochloride and concentrated to a yellow syrup with a musky odour. Purification by flash silica gel chromatography; eluent hexane to 20% ethyl acetate afforded the 4,6-di-*O*-silyl ether **13d** (33 mg, 3%), the 6-*O*-silyl ether **13c** (406 mg, 49%) and starting material **13b** (235 mg, 28%). **Spectroscopic data for ethyl 6*-O-tert*-butyldimethylsilyl*-*2,3-dideoxy--D-*erythro*-hex-2-enopyranoside 13c** Combustion analysis; C14H28O4Si requires C 58.29, H 9.78; found C 58.26, H 9.91; H 5.94 (1H, d, *J* 10.2, 3-H); 5.75 (1H, ddd, *J* 10.2, 2.4, 2.4, 2-H); 4.97 (1H, br s, 1-H); 4.15 (1H, ddd, *J* 6.6, 1.9, 1.9, 4-H); 3.90 (1H, m, 6a-H); 3.76 (3H, m, 5-H, 6b-H, 7a-H); 3.54 (1H, dq, *J* 9.6, 7.1, 7b-H); 2.77 (1H, d, *J* 4.0, OH); 1.23 (3H, t, *J* 7.1, 8-H3) 1.0 (9H, s, 12-H3, 13-H3, 14-H3, (C**H3**)3CSi); 0.09 (6H, s, 9-H3, 10-H3, (C**H3**)2Si); C 133.1 (CH, 2-C); 126.4 (CH, 3-C); 94.4, (CH, 1-C); 70.4 (CH, 4-C); 67.6 (CH, 5-C); 65.9 (CH2, 7-C); 64.3 (CH2, 6-C); 26.3 (CH3 12-C, 13-C, 14-C, (**C**H3)3CSi); 15.8 (CH3, 8-C); *m/z* (EI+) 288 (absent, M, C14H28O4Si); 243 (44%, M - OEt); 225 (21%, M - OEt - H20); 213 (25%); 201 (52%); 185 (82%); 114 (98%, M - tBuMe2SiOCH2CHO, retro Diels-Alder); 105 (68%); 103 (52%) 72 (98%); 69 (59%); 55 (100%, C3H3O); *v*max(neat) 3660 (br); 3250; 3225; 3180; 3145; 1610; 1535; 1470; 1400 (str.); 1240 (br); 985; Rf 0.70 (hexane:EtOAc, 50:50).

**Spectroscopic data for ethyl 4,6-di-(*O-tert*-butyldimethylsilyl)*-*2,3-dideoxy--D-*erythro*-hex-2-eno­pyran­oside 13d** H 5.76 (1H, d, *J* 10.3, 3-H); 5.62 (1H, d, *J* 10.3, 2-H); 4.87 (1H, s, 1-H); 4.03 (1H, d, *J* 7.5, 4-H); 3.77 (2H, m, 7-H2); 3.64 (2H, m, 6-H2); 3.45 (1H, br m, 5-H); 1.16 (3H, t, *J* 7.2, 8-H3); 0.83 (9H, s, 12-H3, 13-H3, 14-H3, or 18-H3, 19-H3, 20-H3, (C**H3**)3CSi); 0.79 (9H, s, 18-H3, 19-H3, 20-H3 or 12-H3, 13-H3, 14-H3, (C**H3**)3CSi); 0.00 (12H, s, 9-H3, 10-H3, 15-H3, 16-H3, (C**H3**)2Si); C 133.3 (CH, 3-C); 124.6 (CH, 2-C); 92.9 (CH, 1-C); 71.6 (CH, 4-C); 63.2 (CH2, 7-C); 62.6 (CH2, 6-C); 61.9 (CH, 5-C); 24.9 (3CH3, 12-C, 13-C, 14-C or 18-C, 19-C, 20-C, (**C**H3)3CSi); 24.7 (18-C, 19-C, 20-C or 12-C, 13-C, 14-C, (**C**H3)3CSi); 17.4 (C, 11-C, 17-C); 14.3 (CH3, 8-C); *m/z* (EI+) 402 (M, C20H42O4Si2, 8%); 345 (36%, M-C4H9); 299 (23%, M - C4H9 - CH3CH2OH); 228 (30%, M - tBuMe2SiOCH2CHO, retro Diels-Alder); 213 (31%); 147 (39%); 117 (100%, Me2SiOCH2CHO; aldehyde from retro Diels-Alder - tBu); 103 (47%); 85 (55%): 73 (76%); 57 (47%); *v*max(CDCl3) 2956 (str.); 2858; 1645, 1472, 1256; 1097; Rf 0.90 (hexane:EtOAc, 50:50).

**Ethyl 6-*O-tert-*butyldimethylsilyl-4-(2'-propiolyl)-2,3-di­de­oxy--D-*erythro*-hex-2-enopyranoside 14**

To a solution of ethyl 6-*O-tert*-butyl­dimethylsilyl-2,3-dideoxy--D-*erythro-*hex-2-enopyranoside **13c** (100 mg, 3.47 mmol) and propiolic acid (2.4 g, 34.5 mmol, 10 equiv.), in dry diethyl ether (10 ml) at -20°C under nitrogen was added a solution of DMAP (30 mg, 0.23 mmol, 0.15 equiv.) and DCC (720 mg, 3.50 mmol, 1.0 equiv.) in dry ether (10 ml). The solution was allowed to attain ambient temperature and stir for 10 hours. The mixture was filtered through cellulose, washed with ice cold hydrochloric acid (1N, 2x10 ml), saturated sodium chloride solution (2x10 ml), dried over magnesium sulphate, filtered and evaporated to a give an oily residue. Flash silica gel column chromato­graphy, eluted with hexane to 20% ethyl acetate afforded the title compound **14** (11 mg, 10%), and starting material **13c** (35 mg, 32%). H 5.88 (2H, m [AB], 2-H, 3-H); 5.40 (1H, ddd, *J* 9.5, 1.3, 1.3, 4-H); 5.03 (1H, s, 1-H); 4.01 (1H, ddd, *J* 9.4, 3.8, 3.8, 5-H); 3.85 (1H, dq, *J* 9.6, 7.1, 7a-H); 3.76 (2H, m [AB], 6-H2); 3.54 (1H, dq, *J* 9.7, 7.1, 7b-H); 2.92 (1H, s, 11-H); 1.22 (3H, t, *J* 7.0, 8-H3); 0.90 (9H, s, 15-H3, 16-H3, 17-H3, (C**H3**)3CSi); 0.07 (6H, s, 12-H3, 13-H3, (C**H3**)2Si); C 152.2 (C=O, 9-C); 131.8 (CH, 2-C); 124.5 (CH, 3-C); 93.8 (CH, 1-C); 75.4 (CH, 11-C); 74.4 (C, 10-C); 68.8 (CH, 4-C); 64.9 (CH, 5-C); 64.0 (CH2, 7-C); 61.4 (CH2, 6-C); 25.8 (3CH3, C-15, C-16, C-17, (**C**H3)2Si); 18.2 (C, C-14); 15.3 (CH3, C-8); *m/z* (EI+) 340 (absent, M, C17H28O4Si); 237 (3%); 223 (3%); 149 (12%); 127 10%); 117 (100%, Me2SiOCH2CHO; aldehyde from retro Diels-Alder - tBu); 89 (27%); 73 (25%); 59 (26%); 57 (100%); *v*max(neat) 3250 (br.); 2900(br.); 2100 (v. str., due to conjugation); 1715 (v. str); Rf 0.90 (hexane:EtOAc, 50:50). This material was insufficiently stable to obtain combustion analysis or HRMS measurements.

**Ethyl 6-*O-tert-*butyldimethylsilyl-4-*O*-(prop-2'-ynyl)-2,3-dideoxy--D-*erythro*-hex-2-enopyranoside 18**[[8]](#endnote-9)

Ethyl 6*-O-tert*-butyl­dimethyl­silyl*-*2,3-dideoxy--D-*erythro*-hex-2-eno­pyran­oside **13c** (0.2 g, 0.70 mmol) was dissolved in dry DMF (4 ml) under nitrogen. Sodium hydride (60% suspension in mineral oil, 45 mg ∫ 30 mg, 1.16 mmol, 1.6 equiv.) was added portionwise and the reaction solution cooled to 0°C. Propargyl bromide (80% solution in toluene, 210 mg ∫170 mg, 1.4 mmol, 2.0 equiv.) was added dropwise to maintain the above temperature. The yellow reaction solution turned dark brown, and was stirred for 14 hours under nitrogen. The crude product was purified by flash column chromatography; eluent hexane to 20% ethyl acetate to yield the title compound **18** as a yellow oil(130 mg, 57%);H 6.07 (1H, d, *J* 10.2, 3-H); 5.77 (1H, dt, *J* 10.2, 2.3, 2-H); 4.98 (1H, t, *J* 1.2, 1-H); 4.22 (2H, m [AB], 9-H2); 4.10 (1H, d, *J* 8.9, 4-H); 3.83 (4H, m, 5-H, 6-H2, 7a-H); 3.52 (1H, dq, *J* 9.7, 7.0, 7b-H); 2.42 (1H, t, 2.4, 11-H); 1.22 (3H, t, *J* 7.0, 8-H3); 0.94 (9H, s, 15-H3, 16-H3, 17-H3, (C**H3**)3CSi); 0.09 (6H, s, 12-H3, 13-H3, (C**H3**)2Si); 1H-1H *J*-COSY NMR 1-H to 2-H to 3-H; 4-H to 5-H to 6-H2; 7a-H to 7b-H to 8-H3; 7a-H to 8-H3; 9-H2 to 11-H; C 130.4 (CH, 3-C); 127.6 (CH, 2-C); 94.4, (CH, 1-C); 80.3 (C, 10-C); 74.8 (CH, 11-C); 70.8, 70.6 (2CH, 4-C and 5-C); 64.1 (CH2, 7-C); 63.2 (CH2, 6-C); 56.7 (CH2, 9-C); 26.3 (3CH3 15-C, 16-C, 17-C, (**C**H3)3CSi); 18.8 (C, 14-C); 15.7 (CH3, 8-C); *m/z* (EI+) 326 (absent, M, C17H30O4Si); 281 (35%, M - OEt); 269 (9%, M - tBu); 223 (44%); 152 (41%, M - tBuMe2SiOCH2CHO, retro Diels-Alder); 117 (100%, Me2SiOCH2CHO; aldehyde from retro Diels-Alder - tBu); 113 (42%, M - tBuMe2SiOCH2CHO - CH2C∫CH); 89 (65%); 85 (82%); 73 (69%); 59 (62%); 57 (73%, C3H7O); *m/z* (CI+, NH3) 344 (72%, C17H34NO4Si requires 344.2257, found 344.2257); 314 (53%); 298 (100%, M + NH4+ - EtOH); 281 (95%, MH - EtOH?); 242 (44%); 225 (21%); 192 (22%); 152 (24%, M - tBuMe2SiOCH2CHO, retro Diels-Alder); *v*max(neat) 3300 (C∫**C-H**) 3040; 2920; 2850; 2150 (weak, C**∫**C); 1460 (s); Rf 0.70 (hexane:EtOAc, 60:40)

**Ethyl 6-*O-tert*-butyldimethylsilyl-4-*O*-(2'-propenyl)-2,3-dideoxy--D-*erythro*-hex-2-enopyranoside 23, ethyl 4,6-di-*O*-(2'-propenyl)-2,3-dideoxy--D-*erythro*-hex-2-eno­pyr­an­oside 21 and ethyl 6-*O-tert*-butyldimethylsilyl-2,3-dideoxy--D-*erythro*-hex-2-eno­pyran­o­sid-4-ulose 22**

Ethyl 6-*O*-*tert*-butyl­di­methyl­silyl-2,3-dideoxy--D-*erythro*-hex-2-eno­pyran­oside **13c** (0.50 g, 1.74 mmol) was dissolved in dry DMF (5 ml) and treated with sodium hydride (60% suspension in mineral oil, 75 mg ∫ 45 mg, 1.87 mmol, 1.1 equiv.) under nitrogen. The reaction was cooled in an ice bath to  5°C. Allyl iodide (490 mg, 2.92 mmol, 1.5 equiv.) was added dropwise to maintain this temperature and the dark brown suspension was stirred under nitrogen for 18 hours. TLC analysis indicated a mixture of products. The reaction solution was filtered, evaporated to dryness, redissolved in CH2Cl2 (10 ml) and washed with water (3x10 ml). The organic layer was evaporated to approx. 1 ml. Purification by flash column chromatography, eluent hexane to 10% ethyl acetate afforded the 6-*O*-silyl ether **23** (0.141 mg, 21%), starting material **13c** (94 mg, 14%), the diallylated sugar **21** (20 mg, 8%), and the enone **22** (11 mg, 2.7%) **Spectroscopic data for ethyl 6-*O-tert*-butyldimethylsilyl-4-*O*-(2'-propenyl)-2,3-dideoxy--D-*erythro*-hex-2-enopyranoside 23** H 5.96 (1H, dd, *J* 10.3, 1.1, 3-H); 5.82 (1H, dddd, *J* 17.4, 10.2, 5.5, 5.5, 10-H); 5.68 (1H, ddd, *J* 10.2, 2.7, 2.0, 2-H); 5.20 (1H, dddd, *J* 17.3, 3.2, 3.2, 1.6, *cis-*11-H); 5.09 (1H, dq, *J* 10.4, 1.4, *trans-*11-H); 4.90 (1H, br s, 1-H); 4.05 (1H, dd, *J* 12.5, 5.5, 9a-H); 3.84 (6H, m, 4-H, 5-H, 6-H2, 7-Ha, 9-Hb); 3.45 (1H, dq, *J* 9.5, 7.1, 7b-H); 1.22 (3H, t, *J* 7.0, 8-H3); 0.94 (9H, s, 15-H3, 16-H3, 17-H3, (C**H3**)3CSi); 0.09 (6H, s, 12-H3, 13-H3, (C**H3**)2Si); H (C6D6) 5.75 (1H, d, *J* 10.2, 3-H); 5.67 (1H, dddd, *J* 17.1, 10.5, 5.3, 5.3, 10-H); 5.53 (1H, ddd, *J* 10.3, 2.0, 2.0, 2-H); 5.07 (1H, dd, *J* 17.2, 1.7, *cis-* 11-H); 4.88 (1H, dd, *J* 10.5, 1.4, *trans-*11-H); 4.78 (1H, d, *J* 2.2, 1-H); 3.94 (2H, br m, 6-H2); 3.75 (5H, 4-H, 5-H, 7a-H, 9-H2); 3.23 (1H, dq, *J* 9.5, 7.1, 7b-H); 1.03 (1H, t, *J* 7.0, 8-H3); 0.88 (9H, s, 15-H3, 16-H3, 17-H3, (C**H3**)3CSi); 0.02 (6H, d, *J* 2.4, 12-H3, 13-H3, (C**H3**)2Si); C 134.9 (CH, 3-H); 131.0 (CH, 10-C); 127.3 (CH, 2-C); 117.3 (CH2, 11-C); 94.5 (CH, 1-C); 70.9, 70.6 (2CH, 4-C, 5-C); 70.1 (CH2, 9-C); 64.0 (CH2, 7-C); 63.3 (CH2, 6-C); 26.4 (3CH3, C-15, C-16, C-17, (**C**H3)3CSi); 18.2 (C, C-14); 15.5 (CH3, 8-C); *m/z* (EI+) 328 (absent, M, C17H32O4Si); 283 (21%, M - OEt); 271 (10%, M - OCH2CH=CH2); 224 (62%); 153 (M - tBuMe2SiOCH2CHO, retro Diels-Alder); 117 (100%, Me2SiOCH2CHO; aldehyde from retro Diels-Alder - tBu); 112 (20%); 57 (55%); *m/z* (CI+, NH3) 346 (M + NH4+, 47%, C17H36NO4Si requires 346.2414, found 346.2414); *v*max(neat) 2960(br); 2930(br); 1460(w); 1370(w); 1250 (s); Rf 0.80 (hexane:EtOAc, 50:50).

**Spectroscopic data for ethyl 4,6-di-*O*-(2'-propenyl)-2,3-dideoxy--D-*erythro*-hex-2-eno­pyr­an­oside 21** Combustion analysis; C14H22O4 requires C 66.12, H 8.72; found C 66.36, H 8.96; H 5.96 (1H, d, *J* 10.2, 3-H); 5.83 (2H, m, 10-H, 13-H); 5.74 (1H, ddd, *J* 10.3, 2.3, 2.3, 2-H); 5.21 (1H, dd, *J* 17.2, 1.5, *cis-*11-H or 14a-H); 5.18 (1H, dd, *J* 17.1, 1.5, *cis-*11-H or 14a-H); 5.10 (1H, *J* 10.2, 0.98, *trans-*11-H or 14b-H); 5.09 (1H, dd, *J* 10.4, 0.9, *trans-*11-H or 14b-H); 4.93 (1H, s, 1-H); 3.98 (5H, m, 12-H2, 9-H2, 4-H); 3.83 (1H, ddd, *J* 9,4, 3.1, 3.1, 5-H, ); 3.75 (1H, dq, *J* 9.7, 7.2, 7a-H); 3.59 (2H, m, 6-H2); 3.45 (1H, dq, *J* 9.7, 7.0, 7b-H); 1.12 (3H, t, *J* 7.1, 8-H3); 1H-1H *J*-COSY NMR 1-H to 2-H to 3-H; 4-H to 5-H to 6-H2; 7a-H to 7b-H to 8-H3; 7a-H to 8-H3; 9-H2 to 10-H (weak) 10-H to *cis-*11-H; 10-H to *trans-*11-H 12-H2 to 13-H (weak); 13-H to *cis-* 14-H; 13-H to *trans-*H-14; C 135.1 (CH, 10-C and 13-C, overlap); 131.2 (CH, 3-C); 127.0 (CH, 2-C); 117.52, 117.41 (2CH2, C-11 and C-14); 94.8 (CH, 1-C); 72.8, 70.5 (2CH2, 6-C, 9-C, 12-C, overlap); 70.4, 69.4 (2CH, 4-C, 5-C); 64.3 (CH, 7-C); 15.7 (CH3, 8-C); *m/z* (EI+) 254 (absent, M, C14H22O4); 154 (73%, retro Diels-Alder, M - H2C=CH-CH2OCH2CHO); 117 (62%, Me2SiOCH2CHO; aldehyde from retro Diels-Alder - tBu); 113 (82%); 85 (100%); 81 (50%); 57 (68%); *v*max (neat) 2976; 2916; 2890; 2859; 1386; 1291; 1260; 1096; 1057 (str.); 1010; 923; Rf 0.40 (hexane:EtOAc, 50:50).

**Spectroscopic data for ethyl 6-*O-tert*-butyldimethylsilyl-2,3-dideoxy--D-*erythro*-hex-2-eno­pyran­o­sid-4-ulose 22** Combustion analysis; C14H27O4Si, requires C 58.53 H 9.41 found C 58.29 H 9.21; H 6.81 (1H, dd, *J* 10.2, 3.4, 2-H); 6.03 (1H, d, *J* 10.3, 3-H); 5.27 (1H, d, *J* 3.4, 1-H); 4.39 (1H, dd, *J* 5.4, 2.7, 5-H); 4.03 (1H, dd, *J* 11.3, 2.5, 6a-H); 3.94 (1H, dd, *J* 11.4, 5.5, 6b-H); 3.85 (1H, dq, *J* 9.6, 7.2, 7a-H); 3.59 (1H, dq, *J* 9.5, 7.1, 7b-H); 1.20 (3H, t, *J* 7.1, 8-H3); 0.81 (9H, s, 12-H3, 13-H3, 14-H3, (C**H3**)3CSi); 0.01 (6H, s, 9-H3, 10-H3, (C**H3**)2Si); 1H-1H *J*-COSY NMR 1-H to 2-H to 3-H; 5-H to 6a-H to 6b-H; 5-H to 6b-H; 7a-H to 7b-H to 8-H3; 7-Hb to 8-H3; C 195.1 (C, 4-C); 144.5 (CH, 3-C); 128.5 (CH, 2-C); 93.3 (CH, 1-C); 76.5 (CH, 5-C); 65.1 (CH2, 7-C); 63.0 (CH2, 6-C); 26.2 (CH3, 12-C, 13-C, 14-C, (**C**H3)3CSi); 18.7 (C, 8-C); 15.5 (C, 11-C); *m/z* (EI+) 284 (absent, M, C14H24O4Si); 241 (39%, M - OEt); 229 (52%, M - tBu); 199 (52%); 183 (50%); 161 (44%, M - tBuMe2Si); 155 (92%, M - tBuMe2SiO); 117 (68%, Me2SiOCH2CHO; aldehyde from retro Diels-Alder - tBu); 89 (79%); 75 (100%, Me2SiOH); 59 (79%); *v*max (neat) 2954; 2930; 2885; 2858; 1700 (str., C=O); 1254; 1134; 1073; 1048 (str.); 1022; 838 (str.); Rf 0.85 (hexane:EtOAc, 50:50).

**(1*S*,3*R*,4*S*,6*S*)-4-*endo*-Acetoxy-3-*exo*-acetoxymethyl-7-(*E*-iodo-methyl­ene)-2,9-dioxabicyclo[3.3.0]nonane 25b**

(1*S*,3*R*,4*S*,6*S*)-4-*endo*-Acetoxy-3-*exo*-acetoxymethyl-7-(*E*-tri-n-butylstannyl­methyl­ene)-2,9-dioxa­bicyclo[4.3.0]nonane **25a** (40 mg, 0.07 mmol) was dissolved in dry benzene (1 ml) and treated dropwise with a solution of iodine (45 mg, 0.18 mmol, 2.5 equiv.) until the reaction solution retained a purple colour. The reaction solution was filtered and solvent evaporated. column chromatography, eluent hexane to 10% ethyl acetate afforded the title compound **25b** as a faintly pink coloured oil (8 mg, 29%); H (CDCl3) 6.07 (1H, td, *J* 2.6, 1.3, 15-H); 5.44 (1H, d, *J* 4.6, 1-H); 4.77 (1H, td, *J* 9.0, 4.5, 4-H); 4.53 (1H, ddd, *J* 14.7, 2.6. 1.5, 8a-H); 4.28 (1H, dd, *J* 12.1, 5.2, 10a-H); 4.22 (1H, ddd, *J* 14.8, 2.6, 0.6, 8b-H); 4.16 (1H, dd, *J* 12.1, 2.6, 10b-H); 4.06 (1H, ddd, *J* 8.6, 5.2, 2.7, 3-H); 2.91 (1H, br. m, 6-H); 2.21 (1H, ddd, *J* 13.4, 6.7, 4.6, *eq*-5-H); 2.09 (3H, s, CH3CO); 2.05 (3H, s, CH3CO); 1.72 (1H, dt, *J* 13.4, 9.4, *ax*-5-H); H (C6D6) 5.32 (1H, dt, *J* 2.5, 1.3, 15-H); 5.02 (1H, d, *J* 4.5, 1-H); 4.76 (1H, td, *J* 9.3, 4.6, 4-H); 4.33 (1H, dd, *J* 12.0, 5.0, 10a-H); 4.27 (1H, ddd, *J* 14.7, 2.5, 1.3, 8a-H); 4.08 (1H, dd, *J* 12.3, 2.3, 10b-H); 3.97 (1H, ddd, *J* 8.6, 5.4, 2.7, 3-H); 3.90 (1H, dd, *J* 14.7, 2.6, 8b-H); 1.99 (1H, m, 6-H); 1.68 (3H, s, CH3CO); 1.66 (3H, s, CH3CO); 1.67 (1H, m, *eq*-5-H); 1.24 (1H, dt, *J* 13,0, 9.6, *ax*-5-H); C (CDCl3 + C6D6); 170.5, 169.78 (s, s, 2C, 2CO, 11-C and 13-C); 151.6 (s, C, 7-C); 101.0 (d, CH, 1-C); 72.9 (t, CH2, 8-C); 70.0 (d, CH, 4-C); 69.4 (d, CH, 15-C); 65.7 (d, CH, 3-C); 62.7 (t, CH2, 10-C); 42.5 (d, CH, 6-C); 29.9 (t, CH2, 5-C); 20.8, 20.6 (q, q, 2CH3, 12-C, 14-C). The residual coupling of the signal at  69.4 in the off resonance spectrum is approximately 1.5x as large as that of the other couplings in the spectrum. This suggests that this signal is due to 15-C, because vinylic 2*J*C,H couplings are generally larger than the corresponding aliphatic couplings[[9]](#endnote-10). Predicted 13C-NMR chemical shifts for alkenes; C 11-C 69.0; actual value  69.4; C 7-C = 155.5; actual value  151.6; Rf 0.50 (hexane:EtOAc, 75;25).

**(1*S*,3*R*,4*S*,6*S*)-4-*endo*-Acetoxy-3-*exo*-acetoxymethyl-7-methylene-2,9-dioxabicyclo[4.3.0]nonane 25c by protio-destannylation**

(1*S*,3*R*,4*S*,6*S*)-4-*endo*-Acetoxy-3-*exo*-acetoxy­methyl-7-(*E*-tri-*n*-butylstannylmethylene)-2,9-dioxa­bicyclo­[4.3.0]­nonane **25a** (100 mg, 0.18 mmol, prepared by cyclisation of the acetylene **7a**; was dissolved in diethyl ether (4 ml) and treated with water (4 ml) containing silica 70-230, 60Å. The solution was stoppered and stirred for 10 days. TLC analysis indicated a single product and a minor amount of starting material. The reaction solution was filtered, evaporated to dryness and redissolved in chloroform. Purification by column chromotography, eluent hexane to 20% diethyl ether, afforded the title product **25c** (23 mg, 47%) as a clear oil; H 5.23 (1H, d, *J* 6.2, 1-H); 4.87 (1H, d, *J* 1.1, 11-H); 4.79 (1H, d, *J* 1.2, 11-H); 4.64 (1H, dt, *J* 9.2, 4.7, 4-H); 4.50 (1H, br. d, *J* 13.5, 8a-H); 4.20 (1H, br. d, *J* 13.5, 8b-H); 4.14 (1H, dd, *J* 12.1, 5.1, 10a-H); 4.02 (1H, dd, *J* 12.1, 2.5, 10b-H); 3.88 (1H, ddd, *J* 8.6, 5.7, 2.8, 3-H); 2.67 (1H, br m, 6-H); 2.08 (1H, m, *eq-*5-H); 1.95 and 1.89 (2 x 3H, s, 13-H3, 15-H3, CH3CO); 1.55 (1H, dt, *J* 13.4, 9.5, *ax-*5-H); H (C6D6) 5.13 (1H, d, *J*, 4.5, 1-H); 4.87 (1H, dt, *J* 9.5, 4.7, 4-H); 4.52 (1H, dd, 3.8, 2.4, 11a-H); 4.43 (1H, dd, *J* 3.5, 1.8, 11b-H); 4.37 (1H, dd, *J* 12.0, 5.1, 10a-H); 4.27 (1H, dd, *J* 13.4, 1.5, 8a-H); 4.15 (1H, dd, *J* 12.0, 2.4, 10b-H); 4.02 (1H, ddd, *J* 9.2, 5.0, 2.5, 3-H); 3.92 (1H, br d, *J* 13.4, 8b-H); 2.07 (1H, m, 6-H); 1.87 (1H, ddd, *J* 13.1, 7.0, 4.8, *eq*-5-H); 1.65 (3H, s, CH3CO); 1.59 (3H, s, CH3CO); 1.32 (1H, ddd, 13.2, 9.9, 9.9, *ax*-5-H); 1H-1H *J*-COSY NMR (C6D6) 1-H to 6-H to *eq*-5-H to *ax*-5-H to 6-H; 3-H to 4-H to *ax*-5-H; 3-H to 10a-H (weak) to 10b-H; 8a-H to 8b-H; 8a-H to 11a-H to 8b-H; note no corrrelations *eq*-5-H to 4-H; 3-H to 10b-H; C 171.3 (C, 12-C, 14-C, CO); 148.5 (C, 7-C); 106.5 (CH2, 11-C); 101.0 (CH, 1-C); 70.1 (CH2, 8-C); 69.3 (CH, 4-C); 66.5 (CH, 3-C); 63.3 (CH2, 10-C); 40.8 (CH, 6-C); 30.7 (CH2, 5-C); 21.3 (2CH3, 13-C, 15-C); *m/z* (EI+) 270 (16%; M, C13H18O6 requires 270.1193, found 270.1103); 182 (18%); 150 (20%); 137 (45%); 122 (62%); 104 (52%); 81 (100%); 79 (54%); *v*max (neat) 2958; 2946; 1740 (str., C=O); 1371; 1297 (str.); 1030 (str.); Rf 0.46 (hexane:Et2O, 40:60).

**1-(2'-Chloro-prop-2'-enyl)-4,6-di-*O*-acetyl-2,3-dideoxy--D-*erythro*-hex-2-enopyranoside 26.**

Tri-*O*-acetyl-D-glucal **6a** (8.20 g, 29.5 mmol) was dissolved in dry benzene (100 ml) containing 2-chloro-2-propen-1-ol (3.32 g, 32.4 mmol, 1.1 equiv.) under nitrogen. Anhydrous zinc chloride (5.23 g, 38.3 mmol, 1.3 equiv.) was added in one portion to the mechanically stirred solution. A purple colour developed after 10 mins, the supernatant was decanted from the gelatinous solid, neutralised with solid sodium bicarbonate, filtered and concentrated to give the title compound as a yellow oil which solidified on standing to a waxy, white solid **26** (8.28 g, 93%). Analysis of the solid by 1H-NMR indicated a mixture of : glycosides in the ratio 92:8. H 5.94 (1H, dd, *J* 10.4, 0.9, 3-H); 5.87 (1H, ddd, *J* 10.3, 2.6, 1.9, 2-H); 5.49 (1H, dd, *J* 2.6, 1.3, *cis*-9-H); 5.38 (1H, dd, *J* 1.5, 0.7, *trans*-9-H); 5.34 (1H, dd, *J* 9.7, 1.5, 4-H); 5.10 (1H, dd, *J* 1.2, 0.6, 1-H); 4.23 (4H, m, 6-H2, 7-H2); 4.16 (1H, ddd, *J* 9.8, 5.3, 2.3, 5-H); 2.11 (3H, s, CH3CO); 2.10 (3H, s, CH3CO); H (C6D6) 5.67 (1H, dd, *J* 9.8, 2.1, 2-H); 5.44 (1H, dd, *J* 10.8, 1.9, 3-H); 5.13 (1H, d, *J* 1.4, *cis*-9-H); 5.07 (1H, s, *trans*-9-H); 4.66 (1H, d, *J* 1.8, 1-H); 4.18 (3H, 4-H, 6-H2); 4.08 (1H, ddd, *J* 9.7, 4.0, 4.0, 5-H); 4.03 (1H, d *J* 13.8, 7a-H); 3.81 (1H, d, *J* 13.7, 7b-H); 1.61 (3H, s, CH3CO); 1.53 (3H, s, CH3CO); C 171.2 (2CO, 10-C and 12-C); 138.2 (C, 8-C); 130.2 (CH, 3-C); 127.6 (CH, 2-C); 114.7 (CH2, 9-C); 94.0 (CH, 1-C); 70.8 (CH, 4-C); 67.7 (CH2, 7-C); 65.5 (CH, 5-H); 63.2 (CH2, 6-C); 21.4 (2CH3, 11-C, 13-C); *m/z* (EI+) 306, 304 (M, C13H17O6Cl, absent); 213 (65%, M - OCH2C(Cl)=CH2); 204, 202 (13%, 33%, M - AcOCH2CHO, retro Diels-Alder); 162, 160 (25%, 100%, M - AcOCH2CHO - H2C=C=O); 153 (46%, M - OCH2C(Cl)=CH2 - AcOH); 111 (86%); 85 (94%); 81 (35%); 75 (30%); 57 (28%); *m/z* (CI+, NH3) 324, 322 (32%, 60%, C13H21N1O635Cl requires 322.1057, found 322.1057); 230 (80%, M + NH4+ - HOCH2C(Cl)=CH2); 213 (100%, M - OCH2C(Cl)=CH2); 153 (21%, M - OCH2C(Cl)=CH2 - AcOH); *v*max (neat) 1740 (str., C=O); 1370; 1230 (str.); 1040 (str.); Rf 0.60 (hexane:EtOAc, 25:75).

**But-3'-ynyl 4,6-di-*O*-acetyl-2,3-dideoxy--D-*erythro*-hex-2-eno­pyran­oside** **28**[[10]](#endnote-11)

Tri-*O*-acetyl-D-glucal **6a** (2.5 g, 9.2 mmol) was dissolved in benzene (50 ml) containing 3-butyn-1-ol (0.71 g, 10.1 mmol, 1.1 equiv.) under nitrogen. Anhydrous zinc chloride (1.7 g, 12.5 mmol, 1.3 equiv.) was added in one portion to the mechanically stirred solution. A purple colour developed after 30 mins, the supernatant was decanted from the gelatinous solid, neutralised with solid sodium bicarbonate, filtered and concentrated to give a clear syrup **28** (1.9 g, 76%). Combustion analysis; C14H18O6 requires 59.58, 6.38, found C 59.33, H 6.50; H 5.89 (1H, dd, *J* 11.0, 0.8, 3-H); 5.85 (1H, ddd, *J* 10.2, 2.5, 1.8, 2-H); 5.30 (1H, dt, *J* 9.6, 1.6, 4-H); 5.08 (1H, dd, *J* 1.1, 0.6, 1-H); 4.22 (2H, m, 6-H2); 4.15 (1H, ddd, *J* 9.6, 5.2, 2.6, 5-H); 3.87 (1H, dt, *J* 9.7 , 6.8, 7a-H); 3.70 (1H, dt, *J* 9.7, 6.9, 7b-H) ; 2.53 (1H, td, *J* 6.8, 2.6, H-10); 2.11, 2.09 (6H, 2s, CH3CO); C 170.8, 170.3 (2CO, 11-C, 13-C); 129.4 (CH, 3-C); 127.6 (CH, 2-C); 94.7 (CH, 1-C); 81.1 (C, 9-C); 73.4 (CH, 10-C); 69.5 (CH, 4-C); 67.2, 66.9 (2CH2, 6-C or 7-C); 65.3 (CH, 5-C); 63.0 (CH2, 8-C); 21.0, 20.8 (2CH3, 12-C, 14-C); *m/z* (EI+) 282 (M, C14H18O6; absent); 213 (61%, M - HC∫C(CH2)2O); 180 (64%, M - CH3CO2CH2CHO, retro Diels-Alder to diene); 153 (26%, M - HC∫C(CH2)2O - CH3CO2H); 138 (100%, M - CH3CO2CH2CHO - C2H2O); 111 (86%, M - CH3CO2CH2CHO - HC∫C(CH2)2O); 53 (80%, C4H5); *v*max (nujol) 3270 (str) 2900 (br); 2100 (weak); 1735 (str.); 1360; Rf 0.6 (EtOAc:MeOH, 85:15). When the reaction was run with a prolonged reaction time (60 min), the -anomer (cf. **28**) ( 5.13, br. s, 1-H) was detected in the 1H-NMR spectrum of the crude reaction mixture ratio 79:21, :.

**Preparation of But-3'-enyl 4,6-di-*O*-acetyl-2,3-dideoxy--D-*erythro*-hex-2-enopyranoside 29b by protio-destannylation**

(1'-Tri-*n*-butyl­stannyl-1'-buten-4'-yl)-4,6-di-*O*-acetyl-2,3-dideoxy--D-*erythro*-hex-2-eno­pyran­oside **29a** (70 mg, 0.12 mmol) was dissolved in diethyl ether (3 ml) containing silica gel (200 mg, TLC grade) and water (3 ml). The reaction solution was stoppered and stirred for 14 days. TLC analysis indicated the absence of starting material. The reaction solution was concentrated to dryness, redissolved in toluene (1 ml) and separated by column chromatography, eluent hexane to 20% diethyl ether to afford the title compound **29b** (14 mg, 40%) as a clear oil. Combustion analysis; C14H20O6 requires C 59.15, H 7.09; found C 58.93, H 7.17; H 5.87 (1H, dd, *J* 10.1, 3.1, 3-H); 5.84 (2H, m, 2-H, 9-H); 5.30 (1H, dd, *J* 9.3, 1.2, 4-H); 5.09 (2H, m, 10-H2); 5.04 (1H, d, *J* 0.5, 1-H); 4.24 (1H, dd, *J* 12.1, 5.4, 6a-H); 4.19 (1H, dd, *J* 12.1, 2.4, 6b-H); 4.10 (1H, ddd, *J* 9.5, 5.5, 2.7, 5-H); 3.82 (1H, ddd, *J* 9.6, 6.9, 6.9, 7a-H); 3.59 (1H, ddd, *J* 9.6, 6.6, 6.6, 7b-H); 2.37 (2H, m, 8-H2); 2.10, 2.08 (3H, 3H, s, s, 12-H3, 14-H3, CH3CO); C 170.8 (s, 11-C or 13-C, CO); 170.3 (s, 13-C or 11-C, CO); 134.8 (d, 9-C); 129.1 (d, 2-C); 127.8 (d, 3-C); 116.6 (t, 10-C); 94.5 (d, 1-C); 68.2 (t, 7-C); 66.3 (d, 4-C); 65.1 (d, 5-C); 63.1 (t, 6-C); 34.2 (t, 8-C); 21.0 (q, 12-C or 14-C); 20.8 (q, 14-C or 12-C); *m/z* (EI+) 284 (M, C14H20O6, absent); 213 (100%, M - OCH2CH2CH=CH2); 182 (69%, M - OHCCH2OAc, retro Diels-Alder); 153 (62%, M - OCH2CH2CH=CH2 - AcOH); 140 (95%); 110 (89%); 86 (46%); 81 (42%); 55 (72%); *v*max (CDCl3) 1741 (str. C=O); Rf 0.7 (hexane:EtOAc, 70:30).

**Preparation of But-3'-enyl 4,6-di-*O*-acetyl-2,3-dideoxy--D-*erythro*-hex-2-enopyranoside 29b by the Ferrier rearrangement**

Tri-*O*-acetyl-D-glucal **6a** (1.0 g, 3.7 mmol) was dissolved in benzene (30 ml) containing 3-buten-1-ol (0.61 g, 7.4 mmol, 2 equiv.) under nitrogen. Anhydrous zinc chloride (0.64 g, 4.8 mmol, 1.3 equiv.) was added in one portion to the mechanically stirred solution. A purple colour developed after 40 mins, the supernatant was decanted from the gelatinous solid, neutralised with solid sodium bicarbonate, filtered and concentrated to give the title compound **29b** (0.83 g, 76%) as a clear syrup. Spectroscopic data was identical to material prepared by destannylation of **29a**.

**(3'-Bromopropyl) 4,6-*O*-di-acetyl-2,3-dideoxy--D-*erythro*-hex-2-eno­pyranoside 31a.**

Tri-*O*-acetyl-D-glucal (5.0 g, 18.4 mmol) **6a** was dissolved in dry toluene (75 ml) containing 3-bromopropanol (95% purity, 2.66 g, 20.2 mmol, 1.1 equiv.) under nitrogen. Anhydrous zinc chloride (3.4 g, 23.4 mmol, 1.3 equiv.) was added portionwise to the mechanically stirred solution. A purple colour developed after 2 mins, the supernatant was decanted from the gelatinous solid, neutralised with solid sodium bicarbonate, filtered and concentrated to give a yellow oil. TLC analysis indicated major product plus several slower Rf impurities. The crude mixture was purified by flash column chromatography, eluent hexane to 20% diethyl ether, to yield the title compound **31a** (1.34 g, 21%) as a yellow oil and an unseparated mixture of product **31a** and starting material **6a** (3.23 g, 52%). 1H-NMR analysis of the crude reaction mixture indicated the presence of a mixture of - and -glycosides in the ratio 89:11. H 5.70 (1H, d, *J* 10.4, 3-H); 5.73 (1H, ddd, *J* 10.3, 1.9, 1.9, 2-H); 5.10 (1H, dd, *J* 9.7, 1.4, 4-H); 4.84 (1H, s, 1-H); 4.00 (2H, m, 6-H2); 3.87 (1H, ddd, *J* 9.5, 5.3, 2.4, 5-H); 3.76 (1H, ddd, *J* 9.9, 6.6, 5.5, 7a-H); 3.44 (1H, ddd, *J* 9.8, 6.0, 5.4, 7b-H); 3.34 (2H, m, 9-H2); 2.11 (2H, m, 8-H2); 1.92 (6H, s, 11-H3, 13-H3, 2CH3CO); H (C6D6) 5.72 (1H, d, *J* 10.2, 2-H); 5.46 (2H, m, 3-H, 4-H); 4.66 (1H, s, 1-H); 4.29 (2H, m, 6-H2); 4.13 (1H, ddd, *J* 9.5, 4.0, 4.0, 5-H); 3.68 (1H, dt, *J* 9.9, 5.9, 7a-H); 3.17 (1H, dt, *J* 10.0, 5.5, 7b-H); 3.07 (2H, m, 9-H2); 1.67 (5H, s & m, CH3CO, 8-H2); 1.57 (3H, s, CH3CO); C 171.2, 171.0 (10-C and 12-C); 128.0 (2-C); 126.7 (3-C); 94.9 (1-C); 67.4 (4-C); 66.4 (7-C); 65.6 (5-H); 63.4 (6-C); 33.0 (9-C); 30.8 (8-C); 21.4, 21.3 (11-C, 13-C); *m/z* (EI+) 352, 350 (M, C13H19O6Br, 11, 13%); 213 (78%, M - OCH2CH2CH2Br); 153 (79%, M - OCH2CH2CH2Br - AcOH); 121 (37%); 110 (100%); 82 (43%); 68(40%); *m/z* (CI+, NH3) 370, 368 (13%, 13%, M + NH4+, C13H23NO679Br requires 368.0709, found 368.0709); 230 (40%, M + NH4+ - HOCH2CH2CH2Br); 213 (100%, M - OCH2CH2CH2Br); *v*max(CDCl3) 2955; 2363 (weak); 1744 (str., C=O); 1438; 1372; 1237; 1045; Rf 0.8 (ether)

**1-(3'-Propyl)-4,6-O-di-*O*-acetyl-2,3-dideoxy--D-*erythro*-hex-2-eno­pyran­oside 31b by Ferrier rearrangement**

Tri-*O*-acetyl-D-glucal **6a** (5.0 g, 18.4 mmol) was dissolved in dry benzene (50 ml) containing propanol (1.23 g, 22.8 mmol, 1.2 equiv.) under nitrogen. Anhydrous zinc chloride (3.4 g, 23.4 mmol, 1.3 equiv.) was added in one portion to the mechanically stirred solution. A purple colour developed after 20 mins, the supernatant was decanted from the gelatinous solid, neutralised with solid sodium bicarbonate, filtered and concentrated to give a clear syrup **31b** (4.1 g, 82%). With NMR and TLC data identical to those reported above. The ratio of the anomeric protons4.96 (1H, s, -1-H); 5.05 (1H, br. s, -1-H); indicated an : ratio of 86:14.

**(Prop-2'-enyl) 4,6-di-*O*-acetyl-2,3-dideoxy--D-*erythro*-hex-2-eno­pyran­oside 33a**

Tri-*O*-acetyl-D-glucal **6a** (10.5 g, 39.2 mmol) was dissolved in dry toluene (150 ml) containing allyl alcohol (2.50 g, 43.1 mmol, 1.1 equiv.) under nitrogen. Anhydrous zinc chloride (7.0 g, 52.2 mmol, 1.3 equiv.) was added in one portion to the mechanically stirred solution. A purple colour developed after 30 mins, the supernatant was decanted from the gelatinous solid, neutralised with solid sodium bicarbonate, filtered and concentrated to give a waxy white solid (10.2 g, 93%); 1H-NMR analysis indicated the presence of  and -propenyl glycosides in a ratio of 86:14. Purification by column chromatography, eluent hexane to 20% ethyl acetate afforded the title compound **33a** (5.6 g, 55%); Combustion analysis; C9H14O4 requires C 58.05, H 7.58; found C 57.85, H 7.81; H 5.90 (3H, m, 2-H, 3-H, 8-H); 5.25 (3H, m, 9-H2, 4-H); 5.08 (1H, s, 1-H); 4.2 (5H, m, 5-H, 6-H2, 7-H2); 2.10, 2.09 (3H, 3H, s, s, 2CH3CO); C 170.6, 170.1 (2C, 2CO); 134.0 (CH, 8-C); 129.0 (CH, 3-C); 127.6 (CH, 2-C); 117.2 (CH2, 9-C); 93.4 (CH, 1-C); 69.0 (CH2, 7-C); 66.8, 65.2 (2CH, 4-C, 5-C); 62.9 (CH2, 6-C); 20.7, 20.5 (2CH3CO); H (C6D6) 6.11 (1H, m, 8-H); 6.03 (1H, d, *J* 9.8, 3-H); 5.83 (1H, dt, *J* 10.1, 2.3, 2-H); 5.77 (1H, dd, *J* 9.4, 1.5, 4-H); 5.51 (1H, ddd *J* 17.2, 1.7, 1.7, *cis-* 9-H); 5.31 (1H, ddd, *J* 10.5, 1.5, 1.5, *trans-* 9-H; *cis*-9-H and *trans*-9-H were assigned using Shoolery's rules. calculated chemical shifts  5.41 and 5.31, respectively); 5.11 (1H, br s, 1-H); 4.54 (2H, m, 6-H2); 4.45 (3H, m, 4-H, 7-H2); 4.12 (1H, app. dddd, *J* 13.0, 5.9, 1.4, 1.4, virtual coupling[[11]](#endnote-12) with 6-H2? 5-H); 1.95 (3H, s, CH3CO); 1.87 (3H, CH3CO); *m/z* (EI+) 270 (M, C13H18O6, absent); 213 (68%, M - OC3H5); 168 (54%, M - AcOCH2CHO, retro Diels-Alder); 153 (54%, M - AcOH - OC3H5); 126 (60%); 111 (60%, M - AcOCH2CHO - OC3H5); 95 (69%); 84 (100%, C4H4O2?); 81 (83%); *m/z* (CI+, NH3) 288 (M + NH4+, 22%, C13H22NO6 requires 288.1447, found 288.1447); 271 (1%, M + H+); 248 (5%, M + NH4+-H2C=C=O); 246 (12%); 230 (38%, M + NH4+ - HOC3H5); 213 (100%, M - OC3H5); *v*max (nujol) 3060 (weak.); 1730 (str., C=O); 1360 (str); 1220; *v*max (neat) 2959; 2899; 1743 (str. C=O); 1372; 1232 (str.); 1042 (str.); Rf 0.60 (hexane:EtOAc, 50:50).

**(2'-Methyl-Prop-2'-enyl) 4,6-di-*O*-acetyl-2,3-dideoxy--D-*erythro*-hex-2-enopyranoside 33b**

Tri-*O*-acetyl-D-glucal **6a** (6.0 g, 22.1 mmol) was dissolved in dry benzene (60 ml) containing 2-methyl-2-prop­en-1-ol (1.75 g, 24.3 mmol, 1.1 equiv.) under nitrogen. Anhydrous zinc chloride (4.1 g, 28.2 mmol, 1.3 equiv.) was added portionwise to the mechanically stirred solution. An amber colour developed over 10 mins, the supernatant was decanted from the gelatinous solid, neutralised with solid sodium bicarbonate, filtered and concentrated to a yellow oil. TLC analysis indicated a complex mixture of products. Purification by flash column chromatography, eluent, hexane to 35% ethyl acetate, afforded the title compound **33b** (2.71 g, 39%) as a yellow oil. Combustion analysis; C14H20O6 requires C 59.14, H 7.10; found C 59.34, H 7.32;H 5.89 (1H, d, *J* 10.4, 3-H); 5.84 (1H, d, *J* 10.3, 1.3, 2-H); 5.31 (1H, d, *J* 9.6, 4-H); 5.06 (1H, s, 1-H); 5.00 (1H, s, *trans-*9-H, Shoolery's rules prediction  5.01); 4.92 (1H, s, *cis-*9-H, Shoolery's rule prediction  4.96); 4.18 (4H, m, 5-H, 6-H2, 7a-H); 3.98 (1H, d, *J* 12.4, 7b-H); 2.10 (3H, s, CH3CO); 2.09 (3H, s, CH3CO); 1.77 (3H, s, 10-H3); C 170.1, 169.6 (2C, 11-C, 13-C, CO); 140.8 (C, 8-C); 128.5 (CH, 3-C); 127.1 (CH, 2-C); 112.0 (CH2, 9-C); 92.8 (CH, 1-C); 71.4 (CH, 4-C); 66.3 (CH2, 7-C); 64.6 (CH, 5-C); 62.3 (CH2, 6-C); 20.2, 20.1 (2CH3, 12-C, 14-C); 18.9 (CH3, 10-C); *m/z* (EI+) 284 (M, C14H20O6, absent); 213 (3%, M - C4H7O); 182 (4%, M - C4H6O3, diene of retro Diels-Alder); 153 (6%, M - H2C=C(CH3)CH2O+ - CH3COOH); 140 (15%, diene from retro Diels-Alder - H2C20); 126 (7%); 111 (20%, diene from retro Diels-Alder - H2C=C(CH3)CH2O+); 86 (18%); 85 (17%); 84 (18%); 83 (14%); 81 (17%); 55 (58%, C4H7); 43 (100%, CH3C∫O+);*v*max (neat) 1740 (str.); 1640 (weak); 1370; Rf 0.5 (hexane:EtOAc).

**Prop-2'-ynyl 2,3-dideoxy--D-erythro-hex-2-enopyranosid-4-ulose 35a**

(Prop-2'-ynyl) 2,3-dideoxy--D-erythro-hex-2-enopyranoside **7b** (1.0 g, 5.4 mmol) was dissolved in dry chloroform (500 ml), treated with manganese dioxide (10.0 g, 114.9 mmol, 10 wt equiv.), and stirred under nitrogen. After 14 days TLC analysis indicated a single product and starting material. The solution was twice filtered through cellulose (2 x 40 g) and evaporated to dryness. The yellow oil was redissolved in chloroform (2 ml) and purified by column chromatography, eluent hexane to EtOAc, to afford the title compound **35a** (330 mg, 33%) as a brown waxy solid and starting material **7b** (230 mg, 23%) as a white solid; Combustion analysis; C9H10O4 requires C 59.34, H 5.53; found C 59.47, H 5.58; H 6.84 (1H, dd, *J* 10.2, 3.7, 2-H); 6.10 (1H, d, *J* 10.3, 3-H); 5.44 (1H, d, *J* 3.5, 1-H); 4.41 (1H, dd, *J* 4.5, 3.8, 5-H); 4.33 (2H, m, 7-H2); 3.92 (1H, m, 6a-H); 3.86 (1H, m, 6b-H); 3.31 (1H, broad, OH); 2.53 (1H, t, *J* 2.1, 9-H); C 195.3 (s, 4-C, CO); 143.5 (d, 2-C); 128.3 (d, 3-C); 91.7 (d, 1-C); 78.6 (s, 8-C); 75.6 (d, 9-C); 74.6 (d, 5-C); 61.6 (t, 6-C); 55.9 (t, 7-C); *m/z* (EI+) 182 (absent, M, C9H10O4); 127 (18%, M- H2C∫C-CH2O); 122 (34%, diene from retro Diels-Alder); 96 (23%); 83 (70%, diene from retro Diels-Alder - H2C∫C-CH2O); 55 (100%, H2C∫C-CH2O); *v*max (nujol) 3300 (br., OH); 2150; 1690 (str., conj. C=O); 1630; 1100; 1030 (br.); Rf 0.30 (hexane:EtOAc).

**(Prop-2'-ynyl) 2,3-dideoxy-6-O-*tert*-butyldimethylsilyl--D-*erythro*-hex-2-enopyran-4-ulose 35b**

(Prop-2'-ynyl) 2,3-dideoxy-6-O-*tert*-butyl­di­methylsilyl--D-*erythro*-hex-2-enopyranoside **7f** (0.60 g, 2.01 mmol) was dissolved in dry dichloromethane (600 ml), treated with manganese dioxide (6.0 g, 10x wt equiv.) under nitrogen for 10 days. TLC analysis indicated a mixture of product and starting material. The solution was filtered through cellulose (2 x 50 g), concentrated and purified by flash column chromatography, eluent hexane to 20% EtOAc to afford the title compound **35b** (320 mg, 53%) as a yellow gum and recovered starting material **7f** (170 mg, 28%). Combustion analysis C15H24O4Si requires C 60.76 H 8.16 found C 60.76 H 8.39; H 6.88 (1H, dd, *J* 10.2, 3.5, 2-H); 6.14 (1H, d *J* 10.3, 3-H); 5.54 (1H, d, *J* 3.5, 1-H); 4.44 (1H, dd, *J* 5.0, 2.9, 5-H); 4.38 (2H, d, *J* 2.4, 7-H2); 4.06 (1H, d, *J* 11.3, 3.0, 6a-H); 4.03 (1H, d, *J* 11.3, 5.0, 6b-H); 2.49 (1H, t, *J* 2.4, 9-H); 0.88 (9H, s, 13-H3, 14-H3, 15-H3, (C**H3**)3CSi); 0.07 (6H, d, *J* 2.3, 10-H, 11-H, (C**H3**)2Si); 1H-1H *J*-COSY NMR 1-H to 2-H to 3-H; 5-H to 6-H2 to 7-H2 to H-9; C 188.9 (4-C); 143.7 (3-C); 129.0 (2-C); 91.5 (C-1); 77.6 (9-C); 76.7, 75.8 (5-C and 8-C); 62.9 (6-C); 55.8 (7-C); 26.2 (13-C, 14-C and 15-C, (**C**H3)3CSi); *v*max (nujol) 3290 (br., OH); 2100 (weak); 1695 (str., conjugated carbonyl); 1460 (br.); *m/z* (EI+) 296 (M, C15H24O4Si, absent); 97 (7%); 83 (22%); 68 (18%); 55 (48%); 53 (100%); Rf 0.75 (hexane:EtOAc).

**(Prop-2'-ynyl) 2,3-dideoxy-6-*O*-pivaloyl--D-*erythro*-hex-2-eno­pyran­o­sid-4-ulose 35c**

(Prop-2'-ynyl) 2,3-dideoxy-6-*O*-pivaloyl--D-*erythro*-hex-2-enopyranoside **7c** (1.0 g, 3.97 mmol), dissolved in dry chloroform (600 ml), was treated with manganese dioxide (10.0 g, 114.9 mmol, x 10 wt equiv.), and stirred under nitrogen for 14 days. TLC analysis indicated a single faster product product plus starting material. The solution was filtered through cellulose and concentrated to a dark green oil. Purifcation of the crude residue by flash column chromatography, eluent hexane to 20% ethyl acetate, afforded the title compound **35c** (300 mg, 30%) and starting material **7c** (150 mg, 15%) both as yellow oils. Combustion analysis C14H18O5 requires C 63.18 H 6.67 found C 62.99 H 6.45; H 6.90 (1H, dd, *J* 10.3, 3.6, 2-H); 6.17 (1H, d, *J* 10.3, 3-H); 5.49 (1H, d, *J* 3.5, 1-H); 4.67 (1H, dd, *J* 5.5, 2.7, 5-H); 4.53 (1H, dd, *J* 12.0, 2.7, 6a-H); 4.45 (1H, dd, *J* 12.0, 5.5, 6b-H); 4.38 (2H, d, *J* 2.4, 7-H2); 2.51 (1H, t, *J* 2.4, 9-H); 1.19 (9H, s, 12-H3, 13-H3, 14-H3, C(C**H3**)3)); C 192.9 (C, 4-C); 172.3 (C, 10-C); 143.4 (CH, 2-C); 127.9 (CH, 3-C); 91.3 (CH, 1-C); 78.4 (C, 8-C); 75.5 (CH, 5-C or 9-C); 73.0 (CH, 5-C or 9-C); 62.4 (CH2, 6-C); 55.6 (CH2, 7-C); 38.7 (C, 11-C); 27.0 (3CH3, 12-C, 13-C, 14-C, C(**C**H3)**3**); C 82.04 (2-C); 73.8 (1-C); 50.56 (3-C); *m/z* (EI+)[[12]](#endnote-13) 266 (4%, C14H18O5, M); 211 (88%, M - HC∫C-CH2); 165 (27%, M - tBuCO2); 122 (89%); 109 (62%); 83 (100%); 57 (85%, tBu); *v*max (neat) 3450 (br., OH); 3270 (str.); 2950 (v.str); 2150 (weak); 1790, 1720 (v str., conj. C=O).

**(1*S*,3*R*,6*S*)-3-*exo*-acetoxymethyl-4-oxo-7-(*Z*-iodo­methyl­ene)-2,9-dioxa­bicyclo­[4.3.0]­nonane 36b** (1*S*,3*R*,6*S*)-3-*exo*-acetoxymethyl-4-oxo-7-(*Z*-tri-*n*-butylstannyl­methylene)-2,9-dioxabicyclo­[4.3.0]­nonane **36a** (8 mg, 0.014 mmol) was dissolved in dry benzene (0.5 ml) and a solution of iodine in benzene (5 mg, 2 ml) was added dropwise. The purple solution was stirred at ambient temperatute for 16 hours. TLC analysis indicated a single product plus a trace of starting material. Column chromatography, eluent hexane to 20% ethyl acetate gave the title product **36b** as a waxy solid (2 mg, 36%). H 6.08 (1H, ddd, *J* 2.5, 2.5, 2.5, 11-H); 5.93 (1H, d, *J* 7.0, 1-H); 4.51 (1H, ddd, *J* 15.0, 2.2, 2.2, 8a-H); 4.34 (3H, m, 8b-H, 10-H2); 4.06 (1H, br. dd, *J* 3.4, 3.4, 3-H); 3.43 (1H, br m, 6-H); 2.78 (1H, dd, *J* 15.7, 5.7, *ax*-5-H); 2.63 (1H, dd, *J* 15.7, 2.7, *eq*-5-H); 1.1 (9H, s, 14-H3, 15-H3, 16-H3, C(C**H3**)3); C 205.8 (s, C, 4-C, C=O); 176.7 (s, C, 12-C, C=O); 149.1 (d, CH, 7-C); 101.8 (d, CH, 1-C); 76.2 (obscured by CDCl3, 8-C); 73.8 (d, CH, 3-C); 70.0 (d, CH, residual coupling, 11-C); 61.7 (t, CH2, 10-C); 41.7 (d, CH, 6-C); 37.7 (t, CH2, 5-C); 28.8 (s, C, 13-C); 28.6 (q, CH3, 14-C, 15-C, 16-C, C(**C**H3)**3**); Rf 0.40 (hexane:EtOAc, 75;25).

**References**

1. 1 For the 1-*O*-ethyl analogue of **7c** see M. Shiozaki, Y. Kobayashi, T. Hata and Y. Furukawa, *Tetrahedron*, 1991, **47**, 2785-2800; [↑](#endnote-ref-2)
2. 2 For the 1-*O*-ethyl analogues of **7c**, **7d** and **35c** see S. J. Prasad, D. L. J. Clive and G. V. J. Silva, *J. Org. Chem.*, 1986, **51**, 2717-2721; N. Prevost and F. Rouessac, *Tetrahedron. Letts.,* 1997, **38**, 4215-4218. [↑](#endnote-ref-3)
3. 3 For the 1-*O*-ethyl analogue of **7f** see S. Lalverde, M. Bernabe, S. Ochoa and A. Gomez, *J. Org. Chem.*, 1990, **55**, 2294-2298; K. Takeda, E. Kaji, Y. Konda, N. Sato and H. Nakamura, *Tetrahedron Letts*., 1992, **33**, 7145; Y. Ichikawa, C. Kobayashi and M. Isobe, *J. Chem. Soc., Perkin Trans.* 1., 1996, 377-382; T. Nishikawa, A. Masanori, N. Ohyabu and M. Isobe, *J. Org. Chem.*, 1998, **63**, 188-192; A. Jamojski and W. A. Sarek, *Pol. J. Chem.*, 1993, **67**, 1261-1265. [↑](#endnote-ref-4)
4. 4 For the 1-*O*-ethyl analogues of **7f** and **35b** see P. J. Card, *J. Org. Chem*., 1982, **47**, 2169-2173. [↑](#endnote-ref-5)
5. 5 J. Lau, J. Wengel, E. B. Pedersen and B. F. Vestergaard, *Synthesis*, 1991, 1183-1190; see also E. A. Couladouros, C. D. Apostolopoulos, M. P. Georgiadis, *Carb Res.*, 1993, **249**, 399-404.. [↑](#endnote-ref-6)
6. 6 W. Voelter, W. Fuchs, J. J. Stezowski, and P. Schott-Kollat, *Angew. Chem. Int. Ed., Engl.*, 1981, **20**, 1042-1043 and references therein. [↑](#endnote-ref-7)
7. 7 M. B. Yunker and B. Fraser-Reid, *Can. J. Chem*., 1976, **54**, 3986-3994; J.-F. Nguefack, V. Bolitt and D. Sinou, *J. Org. Chem*., 1997, **62**, 1341-1347. [↑](#endnote-ref-8)
8. 8 The 6-*O*-triisopropylsilyl-1-*O*-methyl analogue of compound **18** has been prepared in 90% yield, using virtually identical conditions, Y. Xiong, H. Xia and H. W. Moore, *J. Org. Chem*., 1995, **60**, 6460-6467. [↑](#endnote-ref-9)
9. 9 E. Pretsch, W. Simon, J. Seibl and T. Clerc, *Tables of Spectral Data for Structure Determination of Organic Compounds*, Springer-Verlag, Berlin, 1989, C90 & C230. [↑](#endnote-ref-10)
10. 10 The 4,6-di-*O*-methyl-analogue of compound **28** has been reported; B. H. Lipschutz and M. R. Wood, *J. Am. Chem. Soc.,* 1993, **116**, 12625-12626. [↑](#endnote-ref-11)
11. 11 J. I. Musher and E. J. Corey, *Tetrahedron*, 1962, **18**, 791 and references therein. [↑](#endnote-ref-12)
12. 12 The mass spectrometry of 2,3-dideoxy--D-glycero-hex-2-enopyranosid-4-uloses has been investigated see N. L. Holder and B. Fraser-Reid, *Tetrahedron*, 1973, **29**, 4077-4082. [↑](#endnote-ref-13)
